# Supplementary material for: Quantitative analysis of the distribution and mixing of cellulose nanocrystals in thermoplastic composites using Raman chemical imaging
Source: Royal Society of Chemistry journal article supplement (doi:10.1039/c8ra06674d), 2018-01-01
Supplement: c8ra06674d1.pdf [file c8ra06674d1.pdf]

Supporting Information for:

## Quantitative Analysis of the Distribution and Mixing of Cellulose Nanocrystals in Thermoplastic Composites Using Raman Imaging

Anna E. Lewandowska<sup>§,‡</sup>, Nor H. Inai<sup>§</sup>, Oana R. Ghita<sup>§</sup> and Stephen J. Eichhorn<sup>\*,‡</sup>

<sup>§</sup> College of Engineering, Mathematics & Physical Sciences, University of Exeter, North Park Road, Exeter, EX4 4QF, United Kingdom

<sup>‡</sup> Bristol Composites Institute (ACCIS), Department of Aerospace Engineering, University of Bristol, Queen's Building, University Walk, Bristol BS8 1TR, United Kingdom

\* Corresponding Author E-mail: [s.j.eichhorn@bristol.ac.uk](mailto:s.j.eichhorn@bristol.ac.uk)

This file contains the supporting Figures S-1 to S-7 and supporting Tables S-1 to S-4

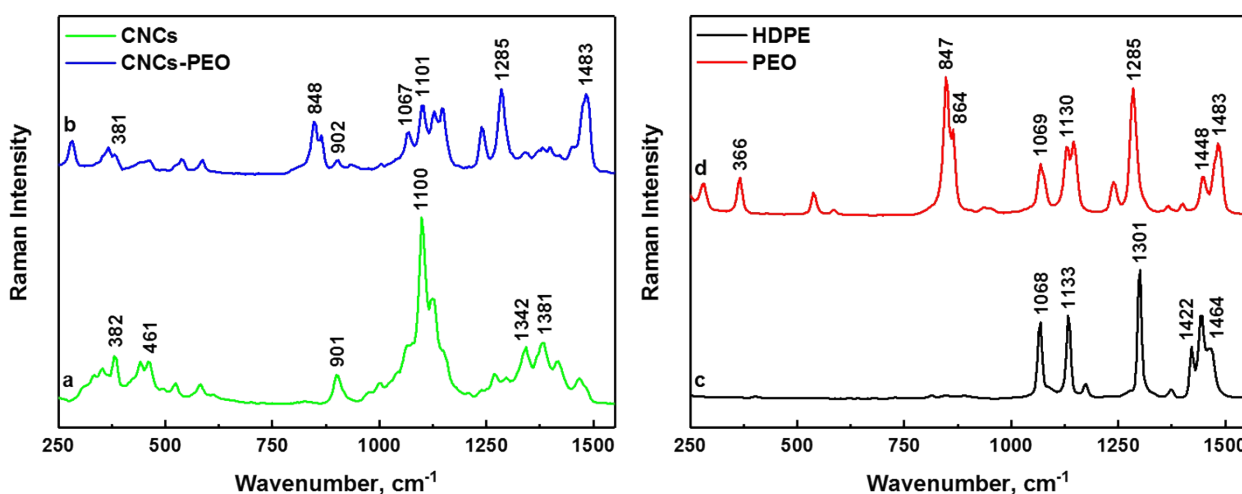

**Figure S-1.** Typical reference Raman spectra for: (a) freeze-dried cellulose nanocrystals (CNCs), (b) freeze-dried CNCs-PEO, (c) high-density polyethylene (HDPE) and (d) poly(ethylene oxide) (PEO).

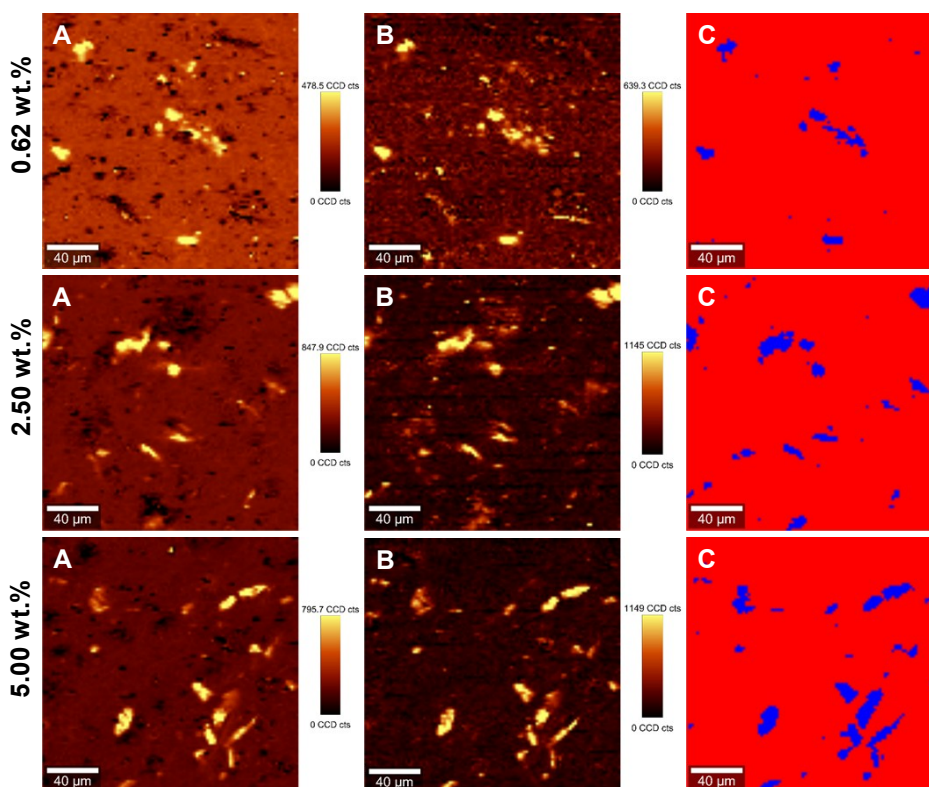

**Figure S-2.** Typical large area Raman images (LARI) of 0.62% (top), 2.50% (middle) and 5.00% (bottom) of CNCs/MAPE/HDPE composites depicting the intensity of Raman bands located at  $\sim 380$   $\text{cm}^{-1}$  (A) and  $\sim 1100$   $\text{cm}^{-1}$  (B). Chemical images of studied area (C) showing HDPE in red and CNCs in blue.

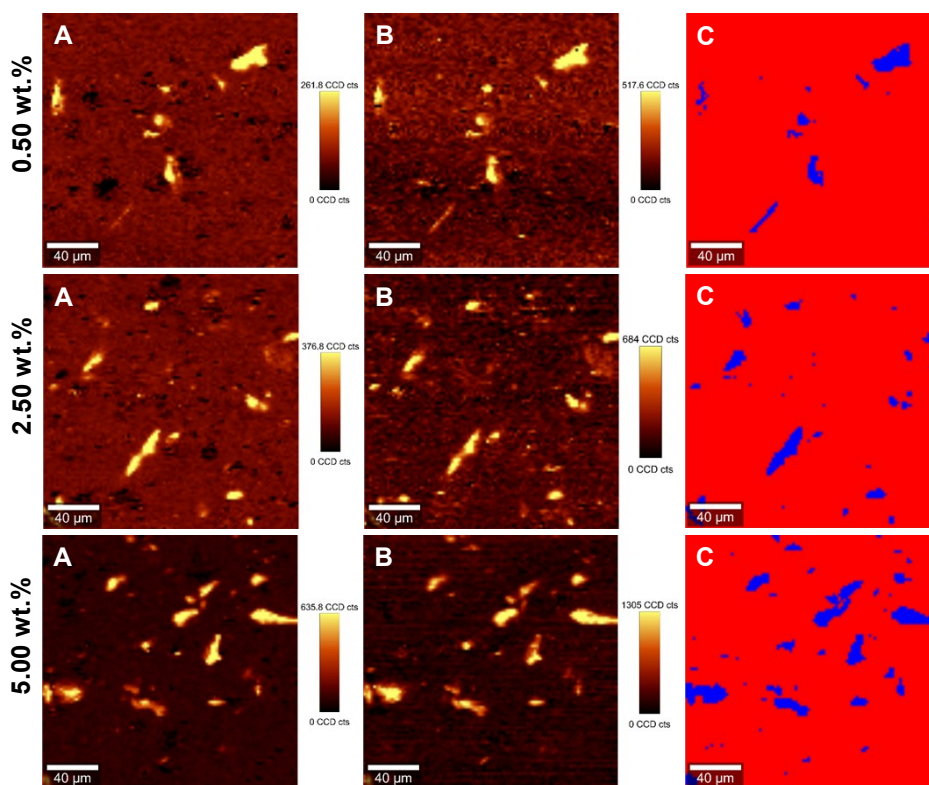

**Figure S-3.** Typical large area Raman images (LARI) of 0.50% (top), 2.50% (middle) and 5.00% (bottom) of CNCs/PEO/HDPE composites depicting the intensity of Raman bands located at  $\sim 380$   $\text{cm}^{-1}$  (A) and  $\sim 1095$   $\text{cm}^{-1}$  (B). Chemical images of studied area (C) showing HDPE in red and CNCs in blue.

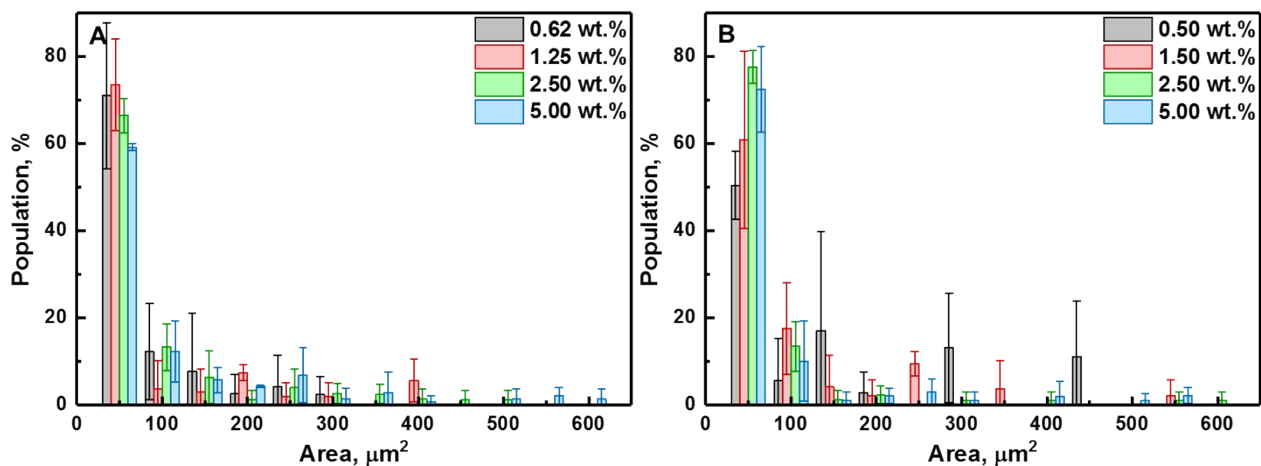

**Figure S-4.** Distribution of CNCs population vs. area of the CNCs aggregates for the CNCs/MAPE/HDPE (A) and CNCs/PEO/HDPE (B) composites. Results based on LARI Raman measurements.

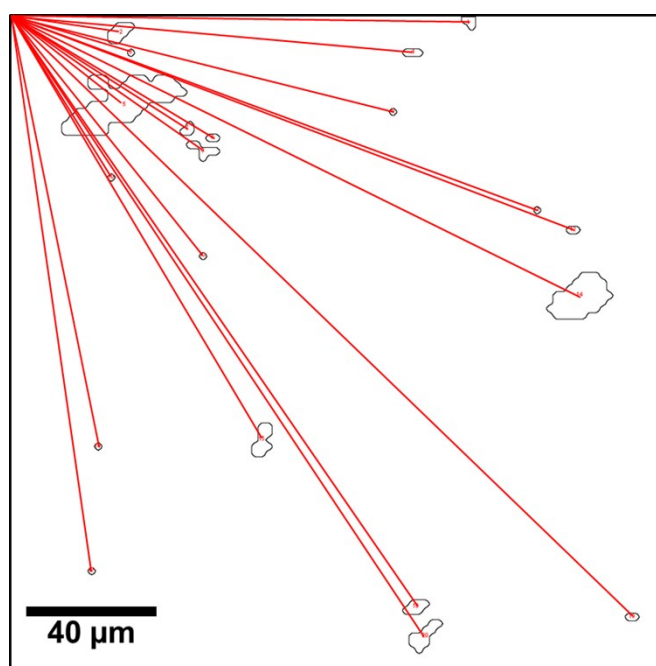

**Figure S-5.** Schematic representation of the ImageJ analysis of CNCs aggregates derived from the chemical image of 1.25% CNCs/MAPE/HDPE samples on Figure 3C. Distances (red lines) are calculated as  $\sqrt{x^2 + y^2}$  from the x and y position of the center of mass of an aggregate (black outlines).

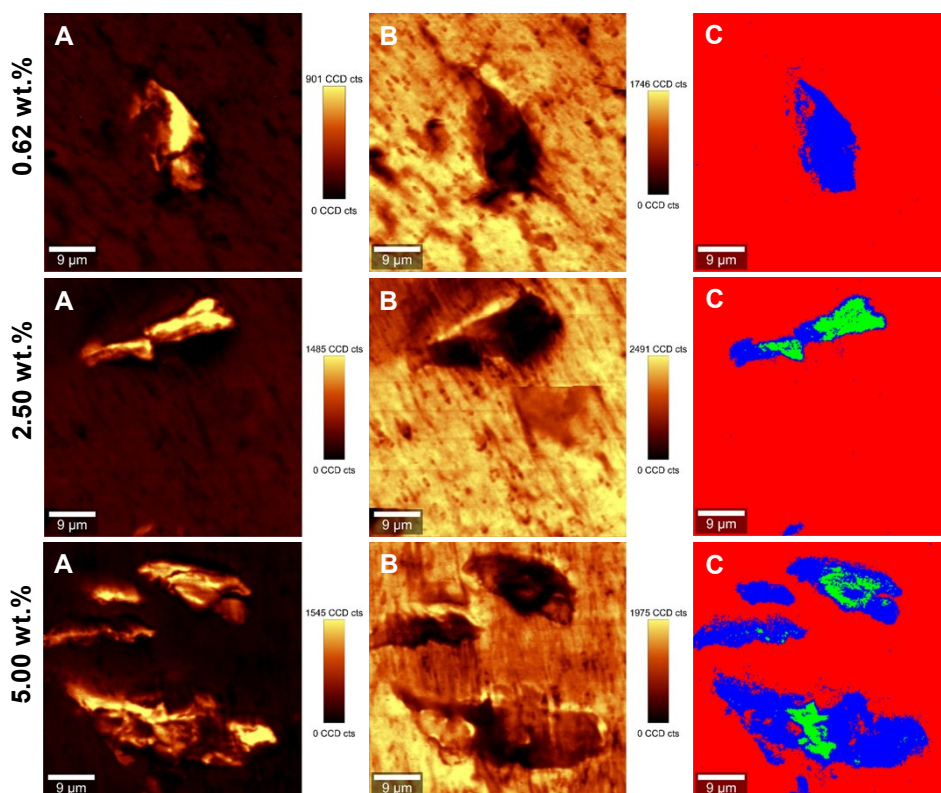

**Figure S-6.** Typical high-resolution Raman images (HRRIs) of 0.62% (top), 2.50% (middle) and 5.00% (bottom) of CNCs/MAPE/HDPE composites depicting the intensity of Raman bands located at  $\sim 1100\text{ cm}^{-1}$  (A) and  $\sim 1301\text{ cm}^{-1}$  (B). Chemical images of studied area (C) showing the chemical composition of a mapped cross-section.

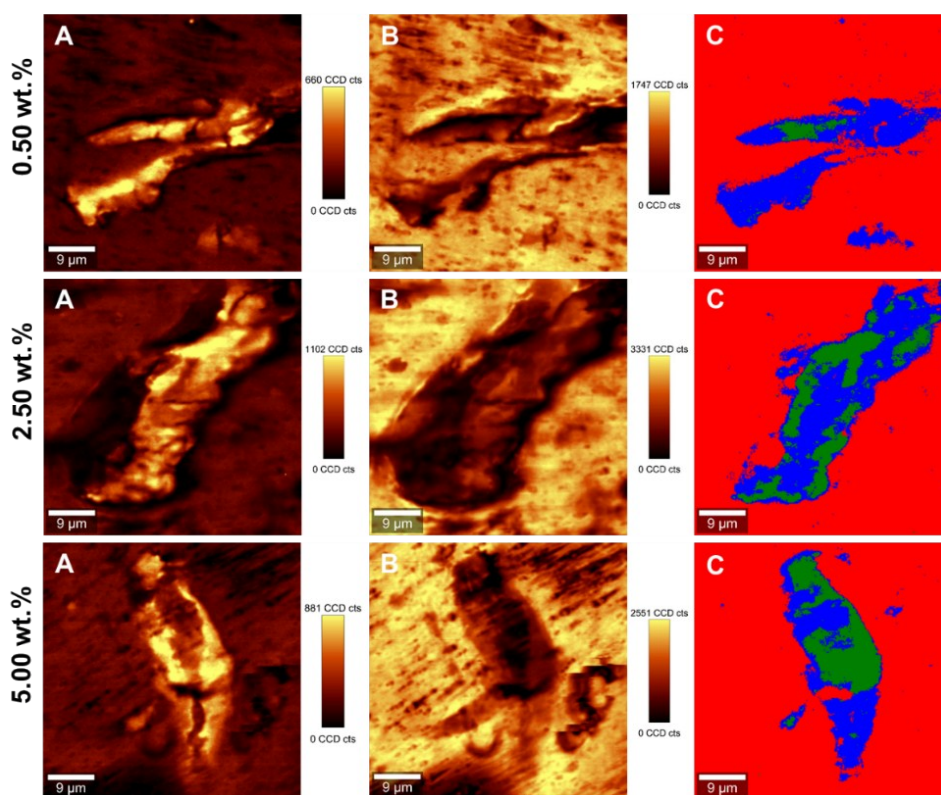

**Figure S-7.** Typical high-resolution Raman images (HRRIs) of 0.50% (top), 2.50% (middle) and 5.00% (bottom) of CNCs/PEO/HDPE composites depicting the intensity of Raman bands located at  $\sim 1100\text{ cm}^{-1}$  (A) and  $\sim 1301\text{ cm}^{-1}$  (B). Chemical images of studied area (C) showing the chemical composition of a mapped cross-section.

**Table S-1. Average distance of CNCs aggregates from an arbitrary point in the coordinate system, average size of CNCs aggregates and Raman based CNCs concentration for the series of CNCs/MAPE/HDPE and CNCs/PEO/HDPE.**

| Composite            | Distance<br>[ $\mu\text{m}$ ] | Size<br>[ $\mu\text{m}^2$ ] | Concentration<br>[wt.%] |
|----------------------|-------------------------------|-----------------------------|-------------------------|
| 0.62% CNCs/MAPE/HDPE | 147 $\pm$ 9                   | 53 $\pm$ 11                 | 1.05 $\pm$ 0.33         |
| 1.25% CNCs/MAPE/HDPE | 149 $\pm$ 10                  | 84 $\pm$ 24                 | 1.90 $\pm$ 0.63         |
| 2.50% CNCs/MAPE/HDPE | 143 $\pm$ 7                   | 70 $\pm$ 12                 | 2.86 $\pm$ 0.97         |
| 5.00% CNCs/MAPE/HDPE | 160 $\pm$ 5                   | 111 $\pm$ 23                | 5.38 $\pm$ 1.55         |
| 0.50% CNCs/PEO/HDPE  | 135 $\pm$ 13                  | 105 $\pm$ 27                | 1.26 $\pm$ 0.21         |
| 1.50% CNCs/PEO/HDPE  | 143 $\pm$ 7                   | 69 $\pm$ 16                 | 1.58 $\pm$ 0.74         |
| 2.50% CNCs/PEO/HDPE  | 150 $\pm$ 6                   | 54 $\pm$ 13                 | 2.53 $\pm$ 0.38         |
| 5.00% CNCs/PEO/HDPE  | 147 $\pm$ 6                   | 149 $\pm$ 44                | 7.52 $\pm$ 3.10         |

**Table S-2. Intensity of selected Raman bands and the intensity ratio used for description of the boundary of mixing degree levels.**

| Composite            | Raman Band Intensity      |                           | Intensity Ratio |
|----------------------|---------------------------|---------------------------|-----------------|
| 1.25% CNCs/MAPE/HDPE | 1301 [ $\text{cm}^{-1}$ ] | 1381 [ $\text{cm}^{-1}$ ] | 1301/1381       |
| Dark Green area      | 117                       | 158                       | 0.74            |
| Green area           | 112                       | 115                       | 0.97            |
| Lime area            | 144                       | 117                       | 1.23            |
| Cyan area            | 162                       | 50                        | 3.23            |
| Blue area            | 235                       | 20                        | 11.86           |
| Navy area            | 355                       | 13                        | 26.88           |
| 1.50% CNCs/PEO/HDPE  | 1301 [ $\text{cm}^{-1}$ ] | 1285 [ $\text{cm}^{-1}$ ] | 1301/1285       |
| Dark Green area      | 88                        | 156                       | 0.55            |
| Green area           | 118                       | 168                       | 0.70            |
| Lime area            | 227                       | 201                       | 1.13            |
| Cyan area            | 312                       | 191                       | 1.63            |
| Blue area            | 393                       | 121                       | 3.26            |
| Navy area            | 578                       | 68                        | 9.14            |

**Table S-3. Average area fraction of the component of chemical maps quantified for CNCs/MAPE/HDPE composites using Image J software.**

| Composite            | Area fraction                   |                                  |                                   | Ratio of fraction |           |
|----------------------|---------------------------------|----------------------------------|-----------------------------------|-------------------|-----------|
|                      | Red (R)*<br>[ $\mu\text{m}^2$ ] | Blue (B)*<br>[ $\mu\text{m}^2$ ] | Green (G)*<br>[ $\mu\text{m}^2$ ] | B/(R+B+G)         | G/(R+B+G) |
| 0.62% CNCs/MAPE/HDPE | 2232±161                        | 183±57                           | 90±151                            | 0.07±0.02         | 0.04±0.06 |
| 1.25% CNCs/MAPE/HDPE | 2316±157                        | 157±130                          | 29±35                             | 0.06±0.05         | 0.01±0.01 |
| 2.50% CNCs/MAPE/HDPE | 2292±102                        | 170±113                          | 41±24                             | 0.07±0.05         | 0.02±0.01 |
| 5.00% CNCs/MAPE/HDPE | 2006±292                        | 382±212                          | 117±136                           | 0.15±0.08         | 0.05±0.05 |

\* Red – fraction area corresponding to HDPE; \* Blue – fraction area corresponding to CNCs + HDPE;  
\* Green - fraction area corresponding to CNCs

**Table S-4. Average area fraction of the component of chemical maps quantified for CNCs/PEO/HDPE composites using Image J software.**

| Composite           | Area fraction                   |                                  |                                   | Ratio of fraction |           |
|---------------------|---------------------------------|----------------------------------|-----------------------------------|-------------------|-----------|
|                     | Red (R)*<br>[ $\mu\text{m}^2$ ] | Blue (B)*<br>[ $\mu\text{m}^2$ ] | Green (G)*<br>[ $\mu\text{m}^2$ ] | B/(R+B+G)         | G/(R+B+G) |
| 0.50% CNCs/PEO/HDPE | 2135±43                         | 248±146                          | 120±123                           | 0.10±0.06         | 0.05±0.05 |
| 1.50% CNCs/PEO/HDPE | 2181±208                        | 183±137                          | 144±112                           | 0.07±0.06         | 0.06±0.05 |
| 2.50% CNCs/PEO/HDPE | 2139±237                        | 215±173                          | 150±87                            | 0.09±0.07         | 0.06±0.03 |
| 5.00% CNCs/PEO/HDPE | 1914±367                        | 241±119                          | 349±255                           | 0.10±0.05         | 0.14±0.10 |

\* Red – fraction area corresponding to HDPE; \* Blue – fraction area corresponding to CNCs + PEO + HDPE; \* Green - fraction area corresponding to CNCs + PEO
